# Supplementary material for: Efficacy of Duhuo Jisheng Decoction for Treating Cold-Dampness Obstruction Syndrome-Type Knee Osteoarthritis: A Pooled Analysis
Source: Biomed Res Int. 2022 Jun 21;2022:2350404. doi: 10.1155/2022/2350404 (PMC9239816; doi:10.1155/2022/2350404)
Supplement: Supplementary Materials — S1: searching strategies for all databases. S2: Composition of formula in each included randomized controlled trials. [file 2350404.f1.zip]

Archive with 2 entries (2 files):
- S1 Searching strategies for all databases.docx
- S2 Composition of formula.docx
